# Supplementary material for: Application of Enteromorpha polysaccharides as a new coagulant aid to remove silver nanoparticles: role of dosage sequence and solution pH
Source: Royal Society of Chemistry journal article supplement (doi:10.1039/c9ra08206a), 2019-01-01
Supplement: c9ra08206a1.pdf [file c9ra08206a1.pdf]

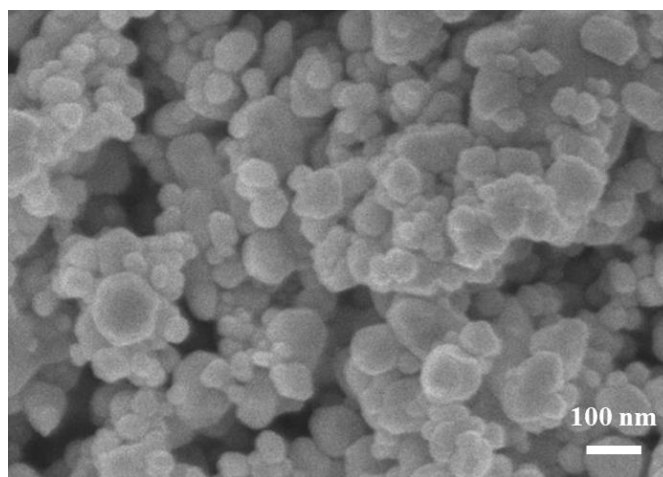

Fig. S1 SEM image of AgNPs powder

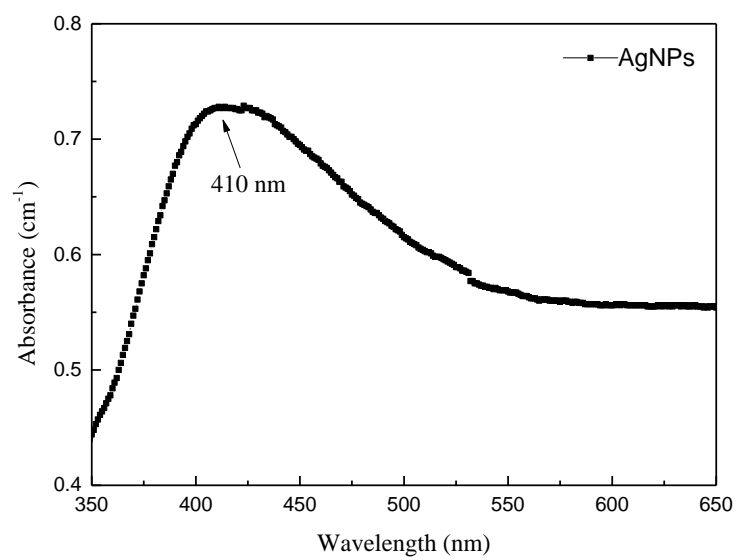

Fig. S2 Determination of maximum absorption wavelength of AgNPs solutions

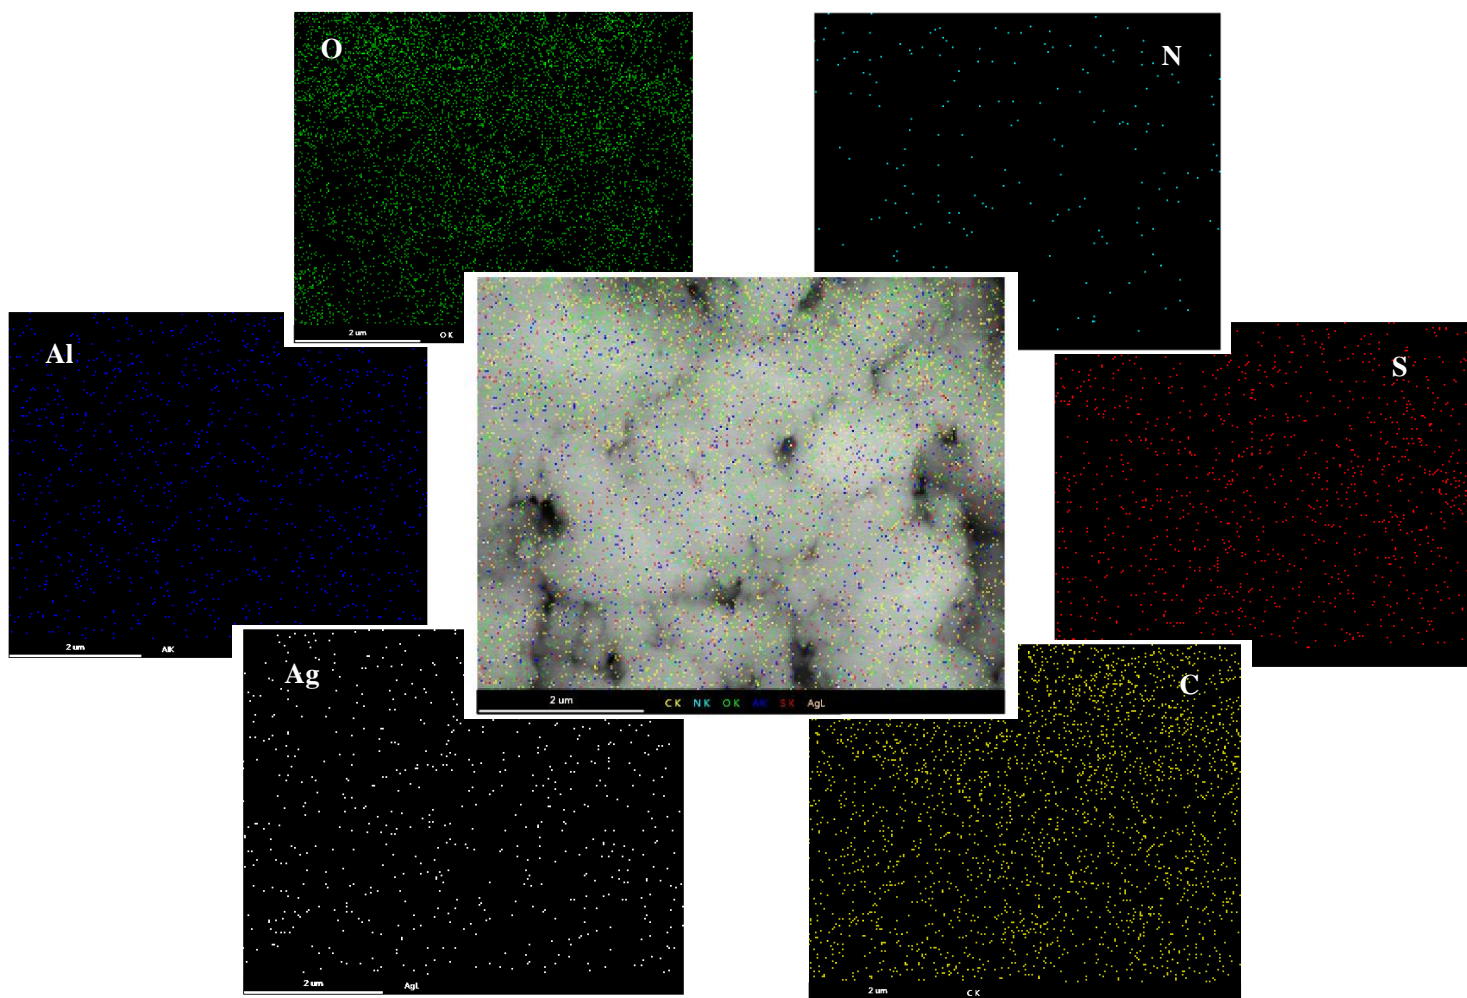

Fig. S3 EDS images of flocs generated by PAC-Ep

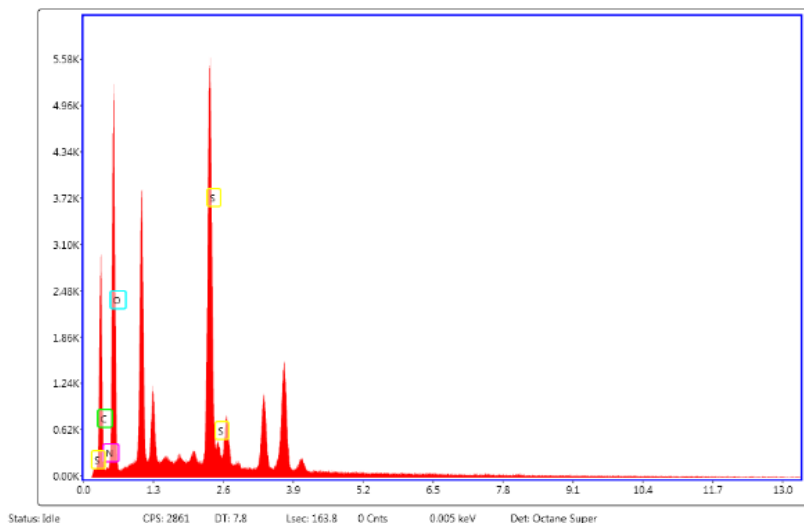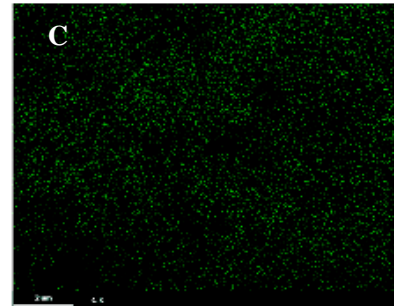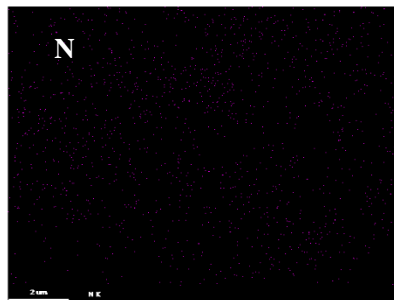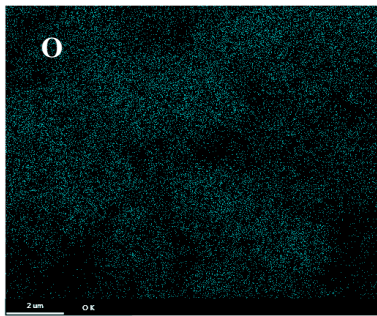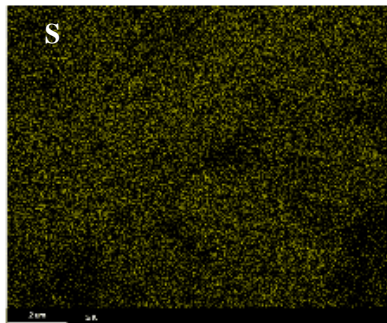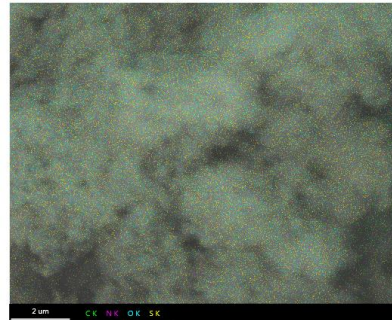

Fig. S4 EDS images of Ep

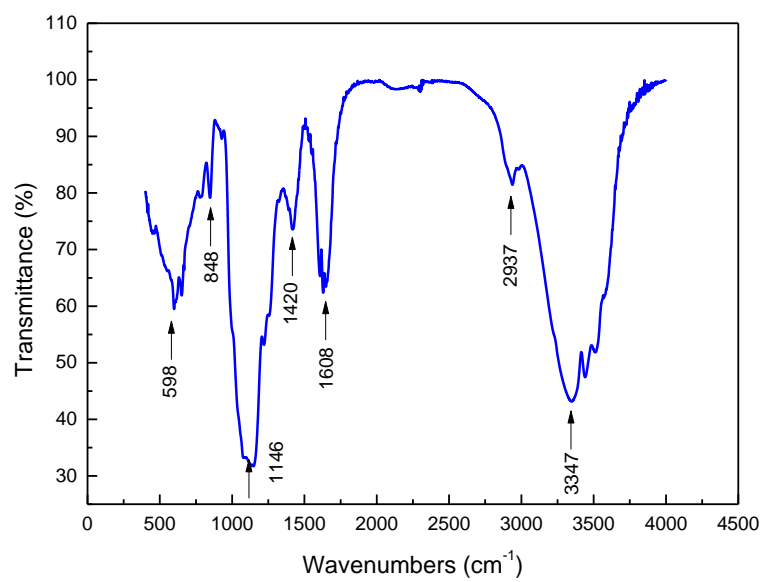

Fig. S5 FTIR spectrum of Ep

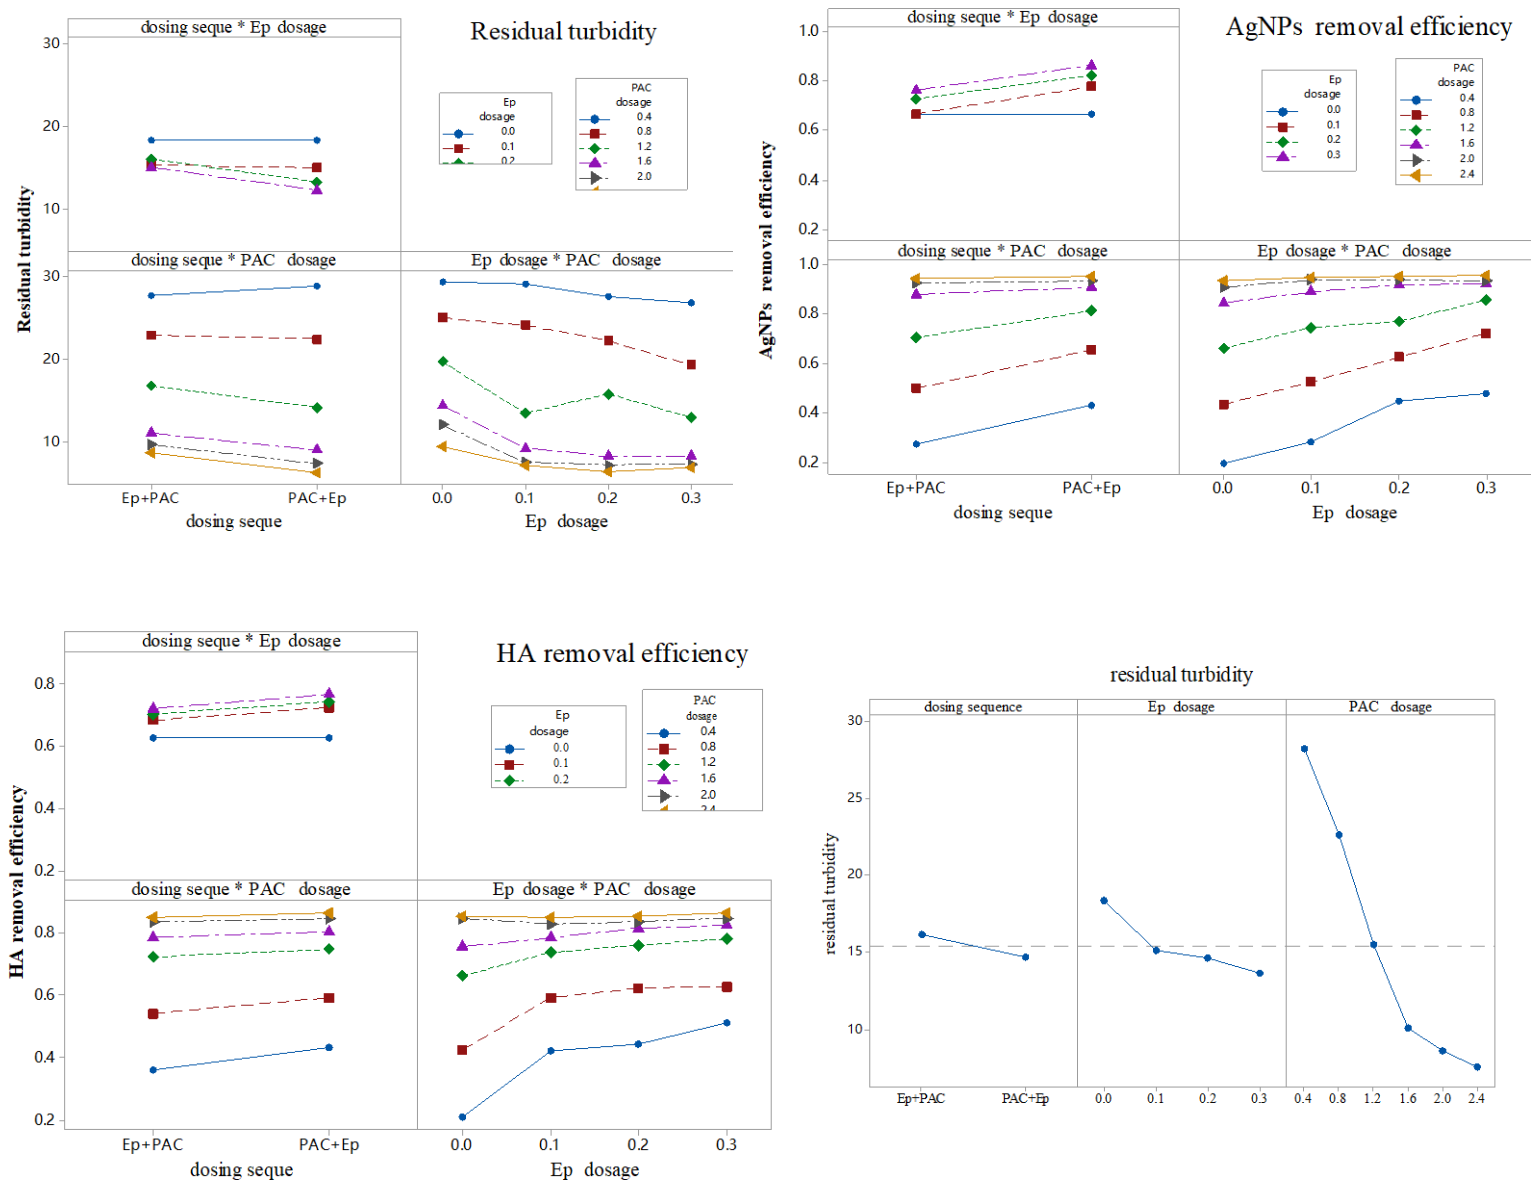

Fig. S6 Main factor and interactions analysis of dose sequence, PAC dosage and Ep dosage
